# Supplementary material for: Global prevalence of diabetes mellitus in patients with tuberculosis: a systematic review and meta-analysis protocol
Source: PubMed Central journal article supplement — BMJ Open. 2017 Jun 9;7(6):e015170. doi: 10.1136/bmjopen-2016-015170 (PMC5734253; doi:10.1136/bmjopen-2016-015170), 2017-06-09
Supplement: bmjopen-2016-015170.draft_revisions.pdf [file bmjopen-2016-015170.draft_revisions.pdf]

# BMJ Open

## Global prevalence of diabetes mellitus in patients with tuberculosis: a systematic review and meta-analysis protocol

|                                 |                                                                                                                                                                                                                                                                                                                                                                                                                                                                                                                                                                                                                                                                                                                                                                                                        |
|---------------------------------|--------------------------------------------------------------------------------------------------------------------------------------------------------------------------------------------------------------------------------------------------------------------------------------------------------------------------------------------------------------------------------------------------------------------------------------------------------------------------------------------------------------------------------------------------------------------------------------------------------------------------------------------------------------------------------------------------------------------------------------------------------------------------------------------------------|
| Journal:                        | <i>BMJ Open</i>                                                                                                                                                                                                                                                                                                                                                                                                                                                                                                                                                                                                                                                                                                                                                                                        |
| Manuscript ID                   | bmjopen-2016-015170                                                                                                                                                                                                                                                                                                                                                                                                                                                                                                                                                                                                                                                                                                                                                                                    |
| Article Type:                   | Protocol                                                                                                                                                                                                                                                                                                                                                                                                                                                                                                                                                                                                                                                                                                                                                                                               |
| Date Submitted by the Author:   | 19-Nov-2016                                                                                                                                                                                                                                                                                                                                                                                                                                                                                                                                                                                                                                                                                                                                                                                            |
| Complete List of Authors:       | Tankeu, Aurel; Faculty of Medecine and Biomedical Sciences, Internal medicine and specialities<br>Bigna, Jean Joel; Centre Pasteur of Cameroon, Epidemiology and Public Health; Faculty of Medicine, University of Paris Sud XI, Le Kremlin Bicêtre<br>Nansseu, Jobert Richie; Mother and Child Centre, Chantal Biya Foundation, Sickle cell unit<br>Endomba, Francky Teddy ; Faculty of Medicine and Biomedical Sciences, University of Yaounde 1, Department of Internal Medicine and specialties<br>Wafeu, Guy; Faculty of Medicine and Biomedical Sciences, University of Yaoundé 1, Internal Medicine and specilaties<br>Kaze, Arnaud; Brigham and Women's Hospital, Harvard Medical School<br>Noubiap, Jean Jacques; Groote Schuur Hospital and University of Cape Town, Department of Medicine, |
| <b>Primary Subject Heading</b>: | Diabetes and endocrinology                                                                                                                                                                                                                                                                                                                                                                                                                                                                                                                                                                                                                                                                                                                                                                             |
| Secondary Subject Heading:      | Infectious diseases, Public health                                                                                                                                                                                                                                                                                                                                                                                                                                                                                                                                                                                                                                                                                                                                                                     |
| Keywords:                       | General diabetes < DIABETES & ENDOCRINOLOGY, Tuberculosis < INFECTIOUS DISEASES, Public health < INFECTIOUS DISEASES                                                                                                                                                                                                                                                                                                                                                                                                                                                                                                                                                                                                                                                                                   |
|                                 |                                                                                                                                                                                                                                                                                                                                                                                                                                                                                                                                                                                                                                                                                                                                                                                                        |

SCHOLARONE™  
Manuscripts

1  
2  
3 **Global prevalence of diabetes mellitus in patients with tuberculosis: a systematic review**  
4  
5 **and meta-analysis protocol**  
6  
7  
8

9  
10 Aurel T. Tankeu<sup>1</sup>, Jean Joël R. Bigna<sup>2,3</sup>, Jobert Richie N. Nansseu<sup>4,5</sup>, Francky Teddy A.  
11 Endomba<sup>1</sup>, Guy Sadeu Wafeu<sup>1</sup>, Arnaud D. Kaze<sup>6</sup>, Jean Jacques N. Noubiap<sup>7\*</sup>  
12  
13

- 14  
15 1. Department of Internal Medicine and Specialties, Faculty of Medicine and Biomedical  
16 Sciences, Yaoundé, Cameroon  
17  
18 2. Department of Epidemiology and Public Health, Centre Pasteur of Cameroon,  
19 Yaoundé, Cameroon  
20  
21 3. Faculty of Medicine, University of Paris Sud XI, Le Kremlin Bicêtre, France  
22  
23 4. Department of Public Health, Faculty of Medicine and Biomedical Sciences,  
24 University of Yaoundé 1, Yaoundé, Cameroon  
25  
26 5. Sickle Cell Disease Unit, Mother and Child Centre of the Chantal Biya Foundation,  
27 Yaoundé, Cameroon  
28  
29 6. Brigham and Women's Hospital, Harvard Medical School, Boston, MA, USA  
30  
31 7. Department of Medicine, Groote Schuur Hospital and University of Cape Town, Cape  
32 Town, South Africa  
33

34  
35 E-mail addresses: ATT: aurelnet2014@yahoo.com; JJRB: bignarimjj@yahoo.fr; JRNN:  
36 jobertrichie\_nansseu@yahoo.fr; ADK: kazearnaud@yahoo.fr; FTAE: [tedissimo@yahoo.com](mailto:tedissimo@yahoo.com);  
37 GSW: [wafeuguy@yahoo.fr](mailto:wafeuguy@yahoo.fr); JJNN: [noubiapjj@yahoo.fr](mailto:noubiapjj@yahoo.fr)  
38  
39

40  
41 \*Corresponding author: Dr Jean Jacques N. Noubiap. Department of Medicine, Groote Schuur  
42 Hospital and University of Cape Town, 7295, Cape Town, South Africa. [noubiapjj@yahoo.fr](mailto:noubiapjj@yahoo.fr).  
43  
44  
45  
46  
47  
48  
49  
50  
51  
52  
53  
54  
55  
56  
57  
58  
59  
60

## Abstract

**Introduction:** Diabetes mellitus is an important risk factor for active tuberculosis (TB), which also adversely affect TB treatment outcomes. The escalating global DM epidemic is fueling the burden of TB and should therefore be a major target in the strategy for ending TB. This review aims to estimate the global prevalence of diabetes mellitus in patients with tuberculosis

**Methods and analysis:** This systematic review will include cross-sectional, case-control or cohort studies of populations including patients diagnosed with tuberculosis that have reported the prevalence of diabetes mellitus using one of the fourth standard recommendations for screening and diagnosis. This protocol is written in accordance with recommendations from the Preferred Reporting Items for Systematic Review and Meta-Analysis Protocols (PRISMA-P) 2015 statement. Relevant abstracts published in English/French from inception to December 31, 2016 will be searched in PubMed, Excerpta Medica Database, and online journals. Additionally, relevant unpublished papers and conference proceedings will be checked, as well as references of included articles. Two investigators will independently screen, select studies, extract data and assess the risk of bias in each study. The study-specific estimates will be pooled through a random-effects meta-analysis model to obtain an overall summary estimate of the prevalence of diabetes across the studies. Heterogeneity will be assessed, and we will pool studies judged to be clinically homogenous. On the other hand, statistical heterogeneity will be evaluated by the  $\chi^2$  test on Cochrane's Q statistic. Funnel-plots analysis and Egger's test will be used to investigate publication bias. Results will be presented by continent or geographic regions.

1  
2  
3 **Ethics and dissemination:** The current study is based on published data, and thus ethical  
4 approval is not required. This systematic review and meta-analysis is expected to inform  
5 health care providers as well as general population on the co-occurrence of these threatening  
6 conditions. The final report of this study, in the form of a scientific paper, will be published in  
7 a peer-reviewed journal. Findings will further be presented at conferences and submitted to  
8 relevant health authorities.  
9  
10  
11  
12  
13  
14

### 15 16 17 18 19 20 **Strengths and limitations of this study**

- 21 - This will be the first systematic review and meta-analysis aiming to estimate the  
22 global prevalence of diabetes mellitus in patients suffering from tuberculosis.  
23
- 24 - Methodological and statistical procedures that will be used to derive accurate  
25 estimates are powerful and reliable.  
26
- 27 - This review would be limited by difficulties related to the accurate diagnosis of  
28 tuberculosis infection in some regions.  
29  
30

31  
32  
33  
34  
35  
36  
37  
38  
39  
40  
41  
42  
43  
44  
45  
46  
47  
48  
49  
50  
51  
52  
53  
54  
55  
56  
57  
58  
59  
60  
Another possible limitation could be the heterogeneity generated by the variability in  
standards used for diagnosis of diabetes mellitus, especially as the definition of  
diabetes has changed over time but assessment of heterogeneity will circumvent this  
limitation

### 59 60 **Ethics and dissemination**

This study is based on published data, and therefore ethical approval is not a requirement. The  
final report of this study in the form of a scientific paper will be published in a peer-reviewed  
journal. Its findings will also be presented at conferences and submitted to relevant health  
authorities. We also plan to update the review in the future to monitor changes and guide

1  
2  
3 health service and policy solutions. This protocol is written in accordance with  
4  
5 recommendations from the Preferred Reporting Items for Systematic Review and Meta-  
6  
7 Analysis Protocols (PRISMA-P) 2015 statement  
8  
9

## 10 11 12 13 **Introduction**

### 14 15 16 **Rationale**

17  
18  
19 Despite the laudable progress registered in the control of tuberculosis, it remains a huge  
20  
21 global health threat [1]. In 2014, an estimated 9.6 million people developed new active TB  
22  
23 and 1.5 million people died from the disease [2]. Although HIV is still the greatest risk factor  
24  
25 for TB, there are several other important determinants of the TB epidemic, among which  
26  
27 diabetes mellitus (DM) is of growing interest [3]. Indeed, there is overwhelming evidence that  
28  
29 DM represents a major impediment in bending the TB epidemic. DM and poor glycaemic  
30  
31 control triple the risk of TB and adversely affect TB treatment outcomes such as prolongation  
32  
33 of culture conversion, treatment failure, relapse and death. Much more, the world is currently  
34  
35 facing a surge in DM prevalence with 1 adult on 11 who has DM and this will increase to 1/10  
36  
37 adults by 2040. The DM epidemic is therefore fueling the TB epidemic [4–6]. The vital need  
38  
39 to address the escalating global DM epidemic as part of the strategy for ending TB has led to  
40  
41 the creation of Collaborative Framework for Care and Control of Tuberculosis and Diabetes  
42  
43 which provides guidance on bidirectional screening and treatment of the two diseases [7–9].  
44  
45 The framework recommends as one major key points the screening and management of DM  
46  
47 in patients with TB [3,10]. Systematic screening has shown prevalence rates of DM in TB  
48  
49 patients up to 15%, especially in countries with high prevalence of DM at the population level  
50  
51 [7–11]. However we are not aware of any previous effort to evaluate the burden of DM in TB  
52  
53 patients at the global level. We present here a protocol for a systematic review and meta-  
54  
55  
56  
57  
58  
59  
60

1  
2  
3 analysis to summarize the existing data on the prevalence of DM in patients with TB, with the  
4  
5 aim of providing accurate data for monitoring of future trends.  
6  
7  
8  
9

## 10 11 **Objectives**

12  
13  
14 This systematic review aims to determine the global prevalence of DM among patients with  
15  
16 TB.  
17

## 18 19 **Review question**

20  
21  
22 This review of studies published in the past 30 years, from 1 January 1986 to 31 August 2016,  
23  
24 should answer the following question:  
25  
26

27  
28 What is the global prevalence of DM among patients with TB?  
29  
30

## 31 32 **Criteria for considering studies for the review**

### 33 34 **Inclusion criteria**

35  
36  
37 We will include cross-sectional, case-control or cohort studies conducted in patients suffering  
38  
39 from pulmonary or extra-pulmonary, drug-sensitive or resistant TB and reporting on the  
40  
41 prevalence of DM or providing enough data to compute this estimate. The diagnosis of  
42  
43 diabetes will have to have been made by a physician or defined based on measured fasting  
44  
45 plasma glucose (FPG), oral glucose tolerance test (OGTT), or self-report, according to WHO  
46  
47 criteria [12]. Tuberculosis cases must have been diagnosed based on WHO criteria [].  
48  
49  
50  
51  
52  
53

### 54 55 **Exclusion criteria**

56  
57 We will exclude:  
58  
59  
60

- 1
- 2
- 3 1. Letters, reviews, commentaries and editorials and cases series with less than 50 patients
- 4
- 5
- 6 2. Duplicates: for studies published in more than one paper, the most comprehensive one
- 7
- 8 reporting the largest sample size will be considered.
- 9
- 10
- 11 3. Studies whose key data will not be accessible even after request from the authors.
- 12
- 13
- 14 4. Studies where the diagnosis of DM is not based on standard and validated criteria.
- 15
- 16
- 17
- 18
- 19

## 20 **Search strategy for identifying relevant studies**

21 The search strategy will be implemented in two stages:

### 22 **Bibliographic database searches**

23 A. Relevant abstracts on the prevalence of DM among TB patients will be identified via

24 searching PubMed, Excerpta Medica Database (Embase), Index Medicus and online journals.

25 The search will be limited to studies published from inception to December 31, 2016. Key

26 search terms will include: “tuberculosis”, “TB”, “mycobacterium”, “diabetes”, “diabetic

27 patients” and “hyperglycemia”. The PubMed search strategy is shown in Table 1, and will be

28 adapted for other databases.

29 B. Abstracts of all eligible papers will be reviewed and their full articles in the second time.

30 Additionally, references of all relevant articles will be scrutinized for other potential data

31 sources, and their full texts will be accessed in a similar way. Authors whose full text papers

32 will not be accessible by the numerous internet-based sources will be directly contacted to

33 provide them. In case of no feedback from these authors, the corresponding studies will be

34 excluded.

### **Selection of studies deemed relevant for inclusion in the review**

Assessment of eligible papers will be independently run by two authors using an assessment guide to ensure that the selection criteria are reliably applied by them all. They will screen titles and abstracts obtained from the searches and retrieve all full texts of potentially eligible papers. Thereafter, they will independently review the full text of each potentially eligible study, compare their results and resolve any discrepancy by discussion and consensus. If a decision is not reached, a third review author will be consulted for arbitration. Level of agreement between review authors will be measured using the Cohen's Kappa statistic [13].

### **Assessment of methodological quality and reporting of data**

The Newcastle-Ottawa Scale (NOS) for assessing the quality of non-randomized studies in meta-analyses will be used to assess the methodological quality and risk of bias for each study [14]. The STROBE checklist will serve to evaluate the quality of reporting of observational studies [22]. Risk of bias and quality scores will be presented in a table.

### **Data extraction and management**

A data extraction sheet will be used to collect information relating to the country, the region, year of publication, type of study, period of the study, study design, study setting, number of participants, mean/median age or age range of the population, diagnostic criteria for each condition, the presence of another important comorbidity like HIV and the prevalence of DM. Where prevalence rates or information for calculating them (eg, sample size, number of outcomes) are lacking, we will directly contact the corresponding author to request the information. We will conduct a subgroup analysis using comorbidities, different diagnosis criteria and period of the study. The results will be separate to show the population



1  
2  
3 characteristics and prevalence within individual countries. Where it will not be possible to  
4  
5 disaggregate the data by country, the study will be presented as one and the countries in which  
6  
7 the study was done will be shown.  
8  
9

### 10 **Statistical analysis**

11  
12  
13 Data will be analyzed using Stata software (Stata Corp V.14, Texas, USA). A meta-analysis  
14  
15 will be conducted for data obtained from studies in which DM will have been diagnosed using  
16  
17 the same diagnosis criteria. Standard errors (SEs) for the study-specific estimates will first be  
18  
19 determined from the point estimate and the appropriate denominators, assuming a binominal  
20  
21 distribution. Then, the study-specific estimates will be pooled through a random-effects meta-  
22  
23 analysis model to obtain an overall summary estimate of the prevalence across studies, after  
24  
25 stabilizing the variance of individual studies using the Freeman-Tukey double arc-sine  
26  
27 transformation [15]. Heterogeneity will be evaluated by the  $\chi^2$  test on Cochrane's Q statistic  
28  
29 which is quantified by  $I^2$  values, assuming that  $I^2$  values of 25%, 50% and 75% represent low,  
30  
31 medium and high heterogeneity respectively [16]. Where substantial heterogeneity will be  
32  
33 detected, a subgroup analysis will be performed to detect its possible sources using the  
34  
35 following grouping variables: age group, the period of diagnosis (beginning or ending of  
36  
37 treatment), positivity of sputum culture at microscopy, relapse or recurrence, association to  
38  
39 others comorbid conditions such as HIV, continent or geographical area and study quality.  
40  
41 Funnel plots analysis and Egger's test will be performed to detect publication bias. Results  
42  
43 will be presented by continent or geographical regions.  
44  
45  
46  
47  
48

### 49 **Results reporting and presentation**

50  
51  
52 The study selection process will be summarised using a flow diagram. Reasons for studies'  
53  
54 exclusion will be described. This will follow the MOOSE Guidelines for Meta-Analyses and  
55  
56 Systematic Reviews of Observational Studies [17]. Tables and forest plots will serve to  
57  
58  
59  
60

1  
2  
3 summarize quantitative data where appropriate. We will examine prevalence by continent,  
4  
5 time period of diagnosis, presence of others comorbid conditions, and classification of TB  
6  
7 infection depending on available data. We plan to report on quality scores and risk of bias for  
8  
9 each eligible study. This may be tabulated and accompanied by narrative summaries.  
10  
11

## 12 13 14 15 16 **Conclusion**

17  
18  
19 TB remains a major global health problem. The prevalence of DM which is known as an  
20  
21 important risk factor for TB patients is escalating worldwide and is thought to contribute  
22  
23 significantly in the burden of TB. According to the rising figures of DM worldwide, we  
24  
25 hypothesized that the global prevalence of DM among TB patients is elevated and we are  
26  
27 conducting this review to estimate its magnitude. We expect to provide accurate data for  
28  
29 effective policies making and for monitoring of future trends.  
30  
31

32  
33 The major limitation of this study could be the heterogeneity generated by the variability in  
34  
35 DM diagnostic criteria for , especially as the definition of DM has changed over time. Despite  
36  
37 these potential limitations, this review will be, to the best of our knowledge, the first study  
38  
39 aiming to estimate the global prevalence of DM among TB patients.  
40  
41  
42  
43

## 44 45 **Protocol and registration**

46  
47 The protocol for this review has been published in the PROSPERO International Prospective  
48  
49 Register of systematic reviews (<http://www.crd.york.ac.uk/PROSPERO>), registration number:  
50  
51 [CRD42016049901](http://www.crd.york.ac.uk/PROSPERO)  
52  
53  
54

## 55 56 **Authors' Contributions**

57  
58  
59  
60

JJNN, ATT, FTAE and GW conceived and designed the protocol. ATT drafted the manuscript. ATT, JJB, JRNN, FTAE, GSW, ADK and JJNN critically revised the manuscript for methodological and intellectual content. JJNN is the guarantor of the review.

All authors approved the final version of this manuscript.

### **Funding**

This research received no specific grant from any funding agency in the public, commercial or not-for-profit sectors.

### **Competing interests**

None.

### **References**

1. GBD 2015 SDG Collaborators. Measuring the health-related Sustainable Development Goals in 188 countries: a baseline analysis from the Global Burden of Disease Study 2015. *Lancet Lond Engl*. 2016 19;
2. Zumla A, George A, Sharma V, et al. The WHO 2014 global tuberculosis report--further to go. *Lancet Glob Health* 2015;3(1):e10–2.
3. Harries AD, Kumar AMV, Satyanarayana S, et al. Addressing diabetes mellitus as part of the strategy for ending TB. *Trans R Soc Trop Med Hyg*. 2016;110(3):173–9.
4. Lönnroth K, Roglic G, Harries AD. Improving tuberculosis prevention and care through addressing the global diabetes epidemic: from evidence to policy and practice. *Lancet Diabetes Endocrinol* 2014 Sep;2(9):730–9.
5. Baker MA, Harries AD, Jeon CY, et al. The impact of diabetes on tuberculosis treatment outcomes: a systematic review *BMC Med*. 2011;9:81.
6. Salindri AD, Kipiani M, Kempker RR, et al. Diabetes Reduces the Rate of Sputum Culture Conversion in Patients With Newly Diagnosed Multidrug-Resistant Tuberculosis. *Open Forum Infect Dis* 2016;3(3):ofw126.
7. Castellanos-Joya M, Delgado-Sánchez G, Ferreyra-Reyes L, et al. Results of the Implementation of a Pilot Model for the Bidirectional Screening and Joint Management of Patients with Pulmonary Tuberculosis and Diabetes Mellitus in Mexico. *PLoS ONE* 2014;9(9).

- 1
  - 2
  - 3
  - 4
  - 5
  - 6
  - 7
  - 8
  - 9
  - 10
  - 11
  - 12
  - 13
  - 14
  - 15
  - 16
  - 17
  - 18
  - 19
  - 20
  - 21
  - 22
  - 23
  - 24
  - 25
  - 26
  - 27
  - 28
  - 29
  - 30
  - 31
  - 32
  - 33
  - 34
  - 35
  - 36
  - 37
  - 38
  - 39
  - 40
  - 41
  - 42
  - 43
  - 44
  - 45
  - 46
  - 47
  - 48
  - 49
  - 50
  - 51
  - 52
  - 53
  - 54
  - 55
  - 56
  - 57
  - 58
  - 59
  - 60
8. Harries AD, Satyanarayana S, Kumar AMV, et al. Epidemiology and interaction of diabetes mellitus and tuberculosis and challenges for care: a review. *Public Health Action* 2013;3(Suppl 1):S3–9.
9. Kumar S, Kumar N, Vivekadhish S. Millennium Development Goals (MDGs) to Sustainable Development Goals (SDGs): Addressing Unfinished Agenda and Strengthening Sustainable Development and Partnership. *Indian J Community Med Off Publ Indian Assoc Prev Soc Med* 2016;41(1):1–4.
10. Kapur A, Harries AD. The double burden of diabetes and tuberculosis - public health implications. *Diabetes Res Clin Pract* 2013;101(1):10–9.
11. Siddiqui AN, Khayyam KU, Sharma M. Effect of Diabetes Mellitus on Tuberculosis Treatment Outcome and Adverse Reactions in Patients Receiving Directly Observed Treatment Strategy in India: A Prospective Study. *BioMed Res Int* 2016;2016:7273935.
12. WHO. Definition and diagnosis of diabetes mellitus and intermediate hyperglycemia: report of a WHO/IDF consultation. Geneva: World Health Organization 2006: 1–50. -
13. Viera AJ, Garrett JM. Understanding interobserver agreement: the kappa statistic. *Fam Med* 2005;37(5):360–3.
14. Turner L, Boutron I, Hróbjartsson A, et al. The evolution of assessing bias in Cochrane systematic reviews of interventions: celebrating methodological contributions of the Cochrane Collaboration. *Syst Rev* 2013;2:79.
15. Miller JJ. The Inverse of the Freeman – Tukey Double Arcsine Transformation. *Am Stat* 1978;32(4):138–138.
16. Huedo-Medina TB, Sánchez-Meca J, Marín-Martínez F, et al. Assessing heterogeneity in meta-analysis: Q statistic or I<sup>2</sup> index? *Psychol Methods* 2006;11(2):193–206.
17. Stroup DF, Berlin JA, Morton SC, et al. Meta-analysis of observational studies in epidemiology: A proposal for reporting. *JAMA* 2000;283(15):2008–12.

**Table 1: Search strategy for PubMed**

| Search | Search terms                                                                                                                               |
|--------|--------------------------------------------------------------------------------------------------------------------------------------------|
| 1      | “Tuberculosis” OR “TB” OR “Mycobacterium”                                                                                                  |
| 2      | “Diabetes” OR “diabetes mellitus” OR “hyperglycemia” OR “diabetic patients” OR dysglycemia OR glucose abnormalities OR glucose intolerance |
| 3      | # 1 AND # 2                                                                                                                                |
| 4      | Studies published in English/French                                                                                                        |

1  
2  
3  
4  
5  
6  
7  
8  
9  
10  
11  
12  
13  
14  
15  
16  
17  
18  
19  
20  
21  
22  
23  
24  
25  
26  
27  
28  
29  
30  
31  
32  
33  
34  
35  
36  
37  
38  
39  
40  
41  
42  
43  
44  
45  
46  
47  
48  
49

**PRISMA-P (Preferred Reporting Items for Systematic review and Meta-Analysis Protocols) with pages containing all items of review protocol**

| Section and topic                 | Page N° of items | Checklist item                                                                                                                                                                                                                |
|-----------------------------------|------------------|-------------------------------------------------------------------------------------------------------------------------------------------------------------------------------------------------------------------------------|
| <b>ADMINISTRATIVE INFORMATION</b> |                  |                                                                                                                                                                                                                               |
| Title:                            |                  |                                                                                                                                                                                                                               |
| Identification                    | 1                | Identify the report as a protocol of a systematic review                                                                                                                                                                      |
| Registration                      | 9                | If registered, provide the name of the registry (such as PROSPERO) and registration number                                                                                                                                    |
| Authors:                          |                  |                                                                                                                                                                                                                               |
| Contact                           | 1                | Provide name, institutional affiliation, e-mail address of all protocol authors; provide physical mailing address of corresponding author                                                                                     |
| Contributions                     | 10               | Describe contributions of protocol authors and identify the guarantor of the review                                                                                                                                           |
| Support:                          |                  |                                                                                                                                                                                                                               |
| Sources                           | 10               | Indicate sources of financial or other support for the review                                                                                                                                                                 |
| Sponsor                           |                  | Provide name for the review funder and/or sponsor                                                                                                                                                                             |
| <b>INTRODUCTION</b>               |                  |                                                                                                                                                                                                                               |
| Rationale                         | 4                | Describe the rationale for the review in the context of what is already known                                                                                                                                                 |
| Objectives                        | 5                | Provide an explicit statement of the question(s) the review will address with reference to participants, interventions, comparators, and outcomes (PICO)                                                                      |
| <b>METHODS</b>                    |                  |                                                                                                                                                                                                                               |
| Eligibility criteria              | 5&6              | Specify the study characteristics (such as PICO, study design, setting, time frame) and report characteristics (such as years considered, language, publication status) to be used as criteria for eligibility for the review |
| Information sources               | 12               | Describe all intended information sources (such as electronic databases, contact with study authors, trial registers or other grey literature sources) with planned dates of coverage                                         |
| Search strategy                   | 10               | Present draft of search strategy to be used for at least one electronic database, including planned limits, such that it could be repeated                                                                                    |
| Study records:                    |                  |                                                                                                                                                                                                                               |
| Data management                   | 6                | Describe the mechanism(s) that will be used to manage records and data throughout the review                                                                                                                                  |
| Selection process                 | 7                | State the process that will be used for selecting studies (such as two independent reviewers) through each phase of the review (that is, screening, eligibility and inclusion in meta-analysis)                               |

|                                    |     |                                                                                                                                                                                                                                                  |
|------------------------------------|-----|--------------------------------------------------------------------------------------------------------------------------------------------------------------------------------------------------------------------------------------------------|
| Data collection process            | 7   | Describe planned method of extracting data from reports (such as piloting forms, done independently, in duplicate), any processes for obtaining and confirming data from investigators                                                           |
| Data items                         | 8   | List and define all variables for which data will be sought (such as PICO items, funding sources), any pre-planned data assumptions and simplifications                                                                                          |
| Outcomes and prioritization        | 8   | List and define all outcomes for which data will be sought, including prioritization of main and additional outcomes, with rationale                                                                                                             |
| Risk of bias in individual studies | 7   | Describe anticipated methods for assessing risk of bias of individual studies, including whether this will be done at the outcome or study level, or both; state how this information will be used in data synthesis                             |
| Data synthesis                     | 8&9 | Describe criteria under which study data will be quantitatively synthesised                                                                                                                                                                      |
|                                    | 8   | If data are appropriate for quantitative synthesis, describe planned summary measures, methods of handling data and methods of combining data from studies, including any planned exploration of consistency (such as $I^2$ , Kendall's $\tau$ ) |
|                                    | 8   | Describe any proposed additional analyses (such as sensitivity or subgroup analyses, meta-regression)                                                                                                                                            |
|                                    | 8   | If quantitative synthesis is not appropriate, describe the type of summary planned                                                                                                                                                               |
| Meta-bias(es)                      | 8   | Specify any planned assessment of meta-bias(es) (such as publication bias across studies, selective reporting within studies)                                                                                                                    |
| Confidence in cumulative evidence  | 8   | Describe how the strength of the body of evidence will be assessed (such as GRADE)                                                                                                                                                               |

# BMJ Open

## Global prevalence of diabetes mellitus in patients with tuberculosis: a systematic review and meta-analysis protocol

|                                 |                                                                                                                                                                                                                                                                                                                                                                                                                                                                                                                                                                                                                                                                                                                                                                                                         |
|---------------------------------|---------------------------------------------------------------------------------------------------------------------------------------------------------------------------------------------------------------------------------------------------------------------------------------------------------------------------------------------------------------------------------------------------------------------------------------------------------------------------------------------------------------------------------------------------------------------------------------------------------------------------------------------------------------------------------------------------------------------------------------------------------------------------------------------------------|
| Journal:                        | <i>BMJ Open</i>                                                                                                                                                                                                                                                                                                                                                                                                                                                                                                                                                                                                                                                                                                                                                                                         |
| Manuscript ID                   | bmjopen-2016-015170.R1                                                                                                                                                                                                                                                                                                                                                                                                                                                                                                                                                                                                                                                                                                                                                                                  |
| Article Type:                   | Protocol                                                                                                                                                                                                                                                                                                                                                                                                                                                                                                                                                                                                                                                                                                                                                                                                |
| Date Submitted by the Author:   | 31-Jan-2017                                                                                                                                                                                                                                                                                                                                                                                                                                                                                                                                                                                                                                                                                                                                                                                             |
| Complete List of Authors:       | Tankeu, Aurel; Faculty of Medecine and Biomedical Sciences, Internal medicine and specialities<br>Bigna, Jean Joel; Centre Pasteur of Cameroon, Epidemiology and Public Health; Faculty of Medicine, University of Paris Sud XI, Le Kremlin Bicêtre<br>Nansseu, Jobert Richie; Mother and Child Centre, Chantal Biya Foundation, Sickle cell unit<br>Endomba, Francky Teddy ; Faculty of Medicine and Biomedical Sciences, University of Yaounde 1, Department of Internal Medicine and specialties<br>Wafeu, Guy; Faculty of Medicine and Biomedical Sciences, University of Yaoundé 1, Internal Medicine and specialities<br>Kaze, Arnaud; Brigham and Women's Hospital, Harvard Medical School<br>Noubiap, Jean Jacques; Groote Schuur Hospital and University of Cape Town, Department of Medicine, |
| <b>Primary Subject Heading</b>: | Diabetes and endocrinology                                                                                                                                                                                                                                                                                                                                                                                                                                                                                                                                                                                                                                                                                                                                                                              |
| Secondary Subject Heading:      | Infectious diseases, Public health, Diabetes and endocrinology                                                                                                                                                                                                                                                                                                                                                                                                                                                                                                                                                                                                                                                                                                                                          |
| Keywords:                       | General diabetes < DIABETES & ENDOCRINOLOGY, Tuberculosis < INFECTIOUS DISEASES, Public health < INFECTIOUS DISEASES                                                                                                                                                                                                                                                                                                                                                                                                                                                                                                                                                                                                                                                                                    |
|                                 |                                                                                                                                                                                                                                                                                                                                                                                                                                                                                                                                                                                                                                                                                                                                                                                                         |

SCHOLARONE™  
Manuscripts



1  
2  
3  
4  
5  
6  
7 **Global prevalence of diabetes mellitus in patients with tuberculosis: a systematic review**  
8 **and meta-analysis protocol**  
9

10  
11  
12 Aurel T. Tankeu<sup>1</sup>, Jean Joël R. Bigna<sup>2,3</sup>, Jobert Richie N. Nansseu<sup>4,5</sup>, Francky Teddy A.  
13 Endomba<sup>1</sup>, Guy Sadeu Wafeu<sup>1</sup>, Arnaud D. Kaze<sup>6</sup>, Jean Jacques N. Noubiap<sup>7\*</sup>  
14  
15

- 16  
17 1. Department of Internal Medicine and Specialties, Faculty of Medicine and Biomedical  
18 Sciences, Yaoundé, Cameroon  
19  
20 2. Department of Epidemiology and Public Health, Centre Pasteur of Cameroon,  
21 Yaoundé, Cameroon  
22  
23 3. Faculty of Medicine, University of Paris Sud XI, Le Kremlin Bicêtre, France  
24  
25 4. Department of Public Health, Faculty of Medicine and Biomedical Sciences,  
26 University of Yaoundé 1, Yaoundé, Cameroon  
27  
28 5. Sickle Cell Disease Unit, Mother and Child Centre of the Chantal Biya Foundation,  
29 Yaoundé, Cameroon  
30  
31 6. Brigham and Women's Hospital, Harvard Medical School, Boston, MA, USA  
32  
33 7. Department of Medicine, Groote Schuur Hospital and University of Cape Town, Cape  
Town, South Africa

34 E-mail addresses: ATT: aurelnet2014@yahoo.com; JJB: bignarimjj@yahoo.fr; JRNN:  
35 jobertrichie\_nansseu@yahoo.fr; ADK: kazearnaud@yahoo.fr; FTAE: [tedissimo@yahoo.com](mailto:tedissimo@yahoo.com);  
36 GSW: [wafeuguy@yahoo.fr](mailto:wafeuguy@yahoo.fr); JJNN: [noubiapjj@yahoo.fr](mailto:noubiapjj@yahoo.fr)  
37  
38

39  
40 \*Corresponding author: Dr Jean Jacques N. Noubiap. Department of Medicine, Groote Schuur  
41 Hospital and University of Cape Town, 7295, Cape Town, South Africa. [noubiapjj@yahoo.fr](mailto:noubiapjj@yahoo.fr).  
42  
43  
44  
45  
46  
47  
48  
49  
50  
51  
52  
53  
54  
55

Field Code Changed

Field Code Changed

Field Code Changed

## Abstract

**Introduction:** Diabetes mellitus is an important risk factor for active tuberculosis (TB), which also adversely affect TB treatment outcomes. The escalating global DM epidemic is fueling the burden of TB and should therefore be a major target in the strategy for ending TB. This review aims to estimate the global prevalence of diabetes mellitus in patients with tuberculosis

**Methods and analysis:** This systematic review will include cross-sectional, case-control or cohort studies of populations including patients diagnosed with tuberculosis that have reported the prevalence of diabetes mellitus using one of the fourth standard recommendations for screening and diagnosis. This protocol is written in accordance with recommendations from the Preferred Reporting Items for Systematic Review and Meta-Analysis Protocols (PRISMA-P) 2015 statement. Relevant abstracts published in English/French from inception to December 31, 2016 will be searched in PubMed, Excerpta Medica Database, and online journals. Two investigators will independently screen, select studies, extract data and assess the risk of bias in each study. The study-specific estimates will be pooled through a random-effects meta-analysis model to obtain an overall summary estimate of the prevalence of diabetes across the studies. Heterogeneity will be assessed, and we will pool studies judged to be clinically homogenous. On the other hand, statistical heterogeneity will be evaluated by the  $\chi^2$  test on Cochrane's Q statistic. Funnel-plots analysis and Egger's test will be used to investigate publication bias. Results will be presented by continent or geographic regions.

### Strengths and limitations of this study

- This will be the first systematic review and meta-analysis aiming to estimate the global prevalence of diabetes mellitus in patients suffering from tuberculosis.
- Methodological and statistical procedures that will be used to derive accurate estimates are powerful and reliable.
- This review would be limited by difficulties related to the accurate diagnosis of tuberculosis infection in some regions.
- Since we will only include studies that full-text or abstracts are published in French/English, we could missed some studies published in another language. However, most of paper now are published in English even from researchers in countries where English is not the official language, so, most of the studies on the topic are expected to be in English.
- Another possible limitation could be the heterogeneity generated by the variability in standards used for diagnosis of diabetes mellitus, especially as the definition of diabetes has changed over time but assessment of heterogeneity will circumvent this limitation

### Ethics and dissemination

This study is based on published data, and therefore ethical approval is not a requirement.

This systematic review and meta-analysis is expected to inform health care providers as well as general population on the co-occurrence of these threatening conditions. The final report of this study in the form of a scientific paper will be published in a peer-reviewed journal. Its findings will also be presented at conferences and submitted to relevant health authorities. We also plan to update the review in the future to monitor changes and guide health service and

1  
2  
3  
4  
5  
6  
7 policy solutions. This protocol is written in accordance with recommendations from the  
8 Preferred Reporting Items for Systematic Review and Meta-Analysis Protocols (PRISMA-P)  
9  
10 2015 statement  
11

## 12 13 14 15 16 **Introduction**

### 17 18 **Rationale**

19  
20  
21 Despite the laudable progress registered in the control of tuberculosis, it remains a huge  
22 global health threat [1]. In 2014, an estimated 9.6 million people developed new active TB  
23 and 1.5 million people died from the disease [2]. Although HIV is still the greatest risk factor  
24 for TB, there are several other important determinants of the TB epidemic, among which  
25 diabetes mellitus (DM) is of growing interest [3]. Indeed, there is overwhelming evidence that  
26 DM represents a major impediment in bending the TB epidemic. DM and poor glycemic  
27 control triple the risk of TB and adversely affect TB treatment outcomes such as prolongation  
28 of culture conversion, treatment failure, relapse and death. Much more, the world is currently  
29 facing a surge in DM prevalence with 1 adult on 11 who has DM and this will increase to 1/10  
30 adults by 2040. The DM epidemic is therefore fueling the TB epidemic [4–6]. The vital need  
31 to address the escalating global DM epidemic as part of the strategy for ending TB has led to  
32 the creation of Collaborative Framework for Care and Control of Tuberculosis and Diabetes  
33 which provides guidance on bidirectional screening and treatment of the two diseases [7–9].  
34 The framework recommends as one major key points the screening and management of DM  
35 in patients with TB [3,10]. Systematic screening has shown prevalence rates of DM in TB  
36 patients up to 15%, especially in countries with high prevalence of DM at the population level  
37 [7–11]. However we are not aware of any previous effort to evaluate the burden of DM in TB  
38 patients at the global level. We present here a protocol for a systematic review and meta-  
39  
40  
41  
42  
43  
44  
45  
46  
47  
48  
49  
50  
51  
52  
53  
54

1  
2  
3  
4  
5  
6  
7 analysis to summarize the existing data on the prevalence of DM in patients with TB, with the  
8 aim of providing accurate data for monitoring of future trends.  
9

## 10 11 12 13 14 **Objectives**

15  
16 This systematic review aims to determine the global prevalence of DM among patients with  
17 TB.  
18  
19

## 20 21 **Review question**

22  
23 This review of studies published in the past 30 years, from 1 January 1986 to 31 August 2016,  
24 should answer the following question:  
25  
26

27  
28 What is the global prevalence of DM among patients with TB?  
29  
30

## 31 **Criteria for considering studies for the review**

### 32 33 34 **Inclusion criteria**

35  
36 We will include cross-sectional, case-control or cohort studies conducted in patients suffering  
37 from pulmonary drug-sensitive or resistant TB and reporting on the prevalence of DM or  
38 providing enough data to compute this estimate. We will consider extra-pulmonary  
39 tuberculosis diagnosed by culture of *Mycobacterium tuberculosis* and also those which will  
40 have been treated as such despite the absence of culture of *Mycobacterium Tuberculosis*.  
41  
42 However, this second group will not be considered for the meta-analysis but will be used for  
43 the narrative part review. The diagnosis of diabetes will have to have been made by a  
44 physician or defined based on measured fasting plasma glucose (FPG), oral glucose tolerance  
45 test (OGTT), or self-report, according to WHO criteria [12]. Tuberculosis cases must have  
46 been diagnosed based on WHO criteria [12].  
47  
48  
49  
50  
51  
52  
53  
54

## Exclusion criteria

We will exclude:

- 1- Commentaries, editorials and cases series with less than 50 patients.
2. Duplicates: for studies published in more than one paper, the most comprehensive one reporting the largest sample size will be considered.
3. Studies whose key data will not be accessible even after request from the authors.

## Search strategy for identifying relevant studies

The search strategy will be implemented in two stages:

### Bibliographic database searches

A. Relevant abstracts on the prevalence of DM among TB patients will be identified via searching PubMed, Excerpta Medica Database (Embase), Index Medicus and African online journals. The search will be limited to studies published from inception to December 31, 2016. Key search terms will include: “tuberculosis”, “TB”, “mycobacterium”, “diabetes”, “diabetic patients” and “hyperglycemia”. The PubMed search strategy is shown in Table 1, and will be adapted for other databases.

B. Abstracts of all eligible papers will be reviewed and their full articles in the second time. Additionally, references of all relevant articles will be scrutinized for other potential data sources, and their full texts will be accessed in a similar way. Authors whose full text papers will not be accessible by the numerous internet-based sources will be directly contacted to

1  
2  
3  
4  
5  
6  
7 provide them. In case of no feedback from these authors, the corresponding studies will be  
8 excluded.  
9

#### 10 11 12 13 14 **Selection of studies deemed relevant for inclusion in the review**

15  
16 Assessment of eligible papers will be independently run by two authors using an assessment  
17 guide to ensure that the selection criteria are reliably applied by them all (ATT and JJB).  
18 They will screen titles and abstracts obtained from the searches and retrieve all full texts of  
19 potentially eligible papers. Thereafter, they will independently review the full text of each  
20 potentially eligible study, compare their results and resolve any discrepancy by discussion and  
21 consensus. If a decision is not reached, a third review author will be consulted for arbitration  
22 (JJB). Level of agreement between review authors will be measured using the Cohen's  
23 Kappa statistic [13].  
24  
25  
26  
27  
28  
29  
30  
31  
32  
33  
34

#### 35 **Assessment of methodological quality and reporting of data**

36  
37 The Newcastle-Ottawa Scale (NOS) for assessing the quality of non-randomized studies in  
38 meta-analyses will be used to assess the methodological quality and risk of bias for each study  
39 [14]. The STROBE checklist will serve to evaluate the quality of reporting of observational  
40 studies [22]. Risk of bias and quality scores will be presented in a table.  
41  
42  
43  
44  
45

#### 46 **Data extraction and management**

47  
48 A data extraction sheet will be used to collect information relating to the country, the region,  
49 year of publication, type of study, period of the study, study design, study setting, number of  
50 participants, mean/median age or age range of the population, diagnostic criteria for each  
51  
52  
53  
54

1  
2  
3  
4  
5  
6  
7 condition, the presence of another important comorbidity like HIV and the prevalence of DM.  
8  
9 Where prevalence rates or information for calculating them (eg, sample size, number of  
10  
11 outcomes) are lacking, we will directly contact the corresponding author to request the  
12  
13 information. We will conduct a subgroup analysis using comorbidities, different diagnosis  
14  
15 criteria and period of the study. The results will be separate to show the population  
16  
17 characteristics and prevalence within individual countries. Where it will not be possible to  
18  
19 disaggregate the data by country, the study will be presented as one and the countries in which  
20  
21 the study was done will be shown.

### 22 23 **Statistical analysis**

24  
25 Data will be analyzed using Stata software (Stata Corp V.14, Texas, USA). A meta-analysis  
26  
27 will be conducted for data obtained from studies in which DM will have been diagnosed using  
28  
29 the same diagnosis criteria. Standard errors (SEs) for the study-specific estimates will first be  
30  
31 determined from the point estimate and the appropriate denominators, assuming a binominal  
32  
33 distribution. Then, the study-specific estimates will be pooled through a random-effects meta-  
34  
35 analysis model to obtain an overall summary estimate of the prevalence across studies, after  
36  
37 stabilizing the variance of individual studies using the Freeman-Tukey double arc-sine  
38  
39 transformation [15]. Heterogeneity will be evaluated by the  $\chi^2$  test on Cochrane's Q statistic  
40  
41 which is quantified by  $I^2$  values, assuming that  $I^2$  values of 25%, 50% and 75% represent low,  
42  
43 medium and high heterogeneity respectively [16]. Where substantial heterogeneity will be  
44  
45 detected, a subgroup analysis will be performed to detect its possible sources using the  
46  
47 following grouping variables: age group, the period of diagnosis (beginning or ending of  
48  
49 treatment), positivity of sputum culture at microscopy, relapse or recurrence, association to  
50  
51 others comorbid conditions such as HIV, continent or geographical area and study quality.  
52  
53 Funnel plots analysis and Egger's test will be performed to detect publication bias. Results  
54  
55 will be presented by continent or geographical regions.



## Results reporting and presentation

The study selection process will be summarised using a flow diagram. Reasons for studies' exclusion will be described. This will follow the MOOSE Guidelines for Meta-Analyses and Systematic Reviews of Observational Studies [17]. Tables and forest plots will serve to summarize quantitative data where appropriate. We will examine prevalence by continent, time period of diagnosis, presence of others comorbid conditions, and classification of TB infection depending on available data. We plan to report on quality scores and risk of bias for each eligible study. This may be tabulated and accompanied by narrative summaries.

## Conclusion

TB remains a major global health problem. The prevalence of DM which is known as an important risk factor for TB patients is escalating worldwide and is thought to contribute significantly in the burden of TB. According to the rising figures of DM worldwide, we hypothesized that the global prevalence of DM among TB patients is elevated and we are conducting this review to estimate its magnitude. We expect to provide accurate data for effective policies making and for monitoring of future trends. Much more, this review may identify the research gaps and remaining challenges that may form the basis of future studies to improve our understanding of the prevalence and impact of DM in TB patients

The major limitation of this study could be the heterogeneity generated by the variability in DM diagnostic criteria for-, especially as the definition of DM has changed over time. Despite these potential limitations, this review will be, to the best of our knowledge, the first study aiming to estimate the global prevalence of DM among TB patients. In addition, since we will only include studies that full-text or abstracts are published in French/English, we could

missed some studies published in another language. However, most of paper now are published in English even from researchers in countries where English is not the official language, so, most of the studies on the topic are expected to be in English.

### Protocol and registration

The protocol for this review has been published in the PROSPERO International Prospective Register of systematic reviews (<http://www.crd.york.ac.uk/PROSPERO>), registration number:

[CRD42016049901](http://www.crd.york.ac.uk/PROSPERO)

Field Code Changed

Field Code Changed

### Authors' Contributions

JJNN, ATT, FTAE and GW conceived and designed the protocol. ATT drafted the manuscript. ATT, JJB, JRNN, FTAE, GSW, ADK and JJNN critically revised the manuscript for methodological and intellectual content. JJNN is the guarantor of the review. All authors approved the final version of this manuscript.

### Funding

This research received no specific grant from any funding agency in the public, commercial or not-for-profit sectors.

### Competing interests

None.

### References

1. GBD 2015 SDG Collaborators. Measuring the health-related Sustainable Development Goals in 188 countries: a baseline analysis from the Global Burden of Disease Study 2015. *Lancet Lond Engl*. 2016 19;

1  
2  
3  
4  
5  
6  
7  
8  
9  
10  
11  
12  
13  
14  
15  
16  
17  
18  
19  
20  
21  
22  
23  
24  
25  
26  
27  
28  
29  
30  
31  
32  
33  
34  
35  
36  
37  
38  
39  
40  
41  
42  
43  
44  
45  
46  
47  
48  
49  
50  
51  
52  
53  
54  
55  
56  
57  
58  
59  
60

2. Zumla A, George A, Sharma V, et al. The WHO 2014 global tuberculosis report--further to go. *Lancet Glob Health* 2015;3(1):e10–2.
3. Harries AD, Kumar AMV, Satyanarayana S, et al. Addressing diabetes mellitus as part of the strategy for ending TB. *Trans R Soc Trop Med Hyg.* 2016;110(3):173–9.
4. Lönnroth K, Roglic G, Harries AD. Improving tuberculosis prevention and care through addressing the global diabetes epidemic: from evidence to policy and practice. *Lancet Diabetes Endocrinol* 2014 Sep;2(9):730–9.
5. Baker MA, Harries AD, Jeon CY, et al. The impact of diabetes on tuberculosis treatment outcomes: a systematic review *BMC Med.* 2011;9:81.
6. Salindri AD, Kipiani M, Kempker RR, et al. Diabetes Reduces the Rate of Sputum Culture Conversion in Patients With Newly Diagnosed Multidrug-Resistant Tuberculosis. *Open Forum Infect Dis* 2016;3(3):ofw126.
7. Castellanos-Joya M, Delgado-Sánchez G, Ferreyra-Reyes L, et al. Results of the Implementation of a Pilot Model for the Bidirectional Screening and Joint Management of Patients with Pulmonary Tuberculosis and Diabetes Mellitus in Mexico. *PLoS ONE* 2014;9(9).
8. Harries AD, Satyanarayana S, Kumar AMV, et al. Epidemiology and interaction of diabetes mellitus and tuberculosis and challenges for care: a review. *Public Health Action* 2013;3(Suppl 1):S3–9.
9. Kumar S, Kumar N, Vivekadhish S. Millennium Development Goals (MDGs) to Sustainable Development Goals (SDGs): Addressing Unfinished Agenda and Strengthening Sustainable Development and Partnership. *Indian J Community Med Off Publ Indian Assoc Prev Soc Med* 2016;41(1):1–4.
10. Kapur A, Harries AD. The double burden of diabetes and tuberculosis - public health implications. *Diabetes Res Clin Pract* 2013;101(1):10–9.
11. Siddiqui AN, Khayyam KU, Sharma M. Effect of Diabetes Mellitus on Tuberculosis Treatment Outcome and Adverse Reactions in Patients Receiving Directly Observed Treatment Strategy in India: A Prospective Study. *BioMed Res Int* 2016;2016:7273935.
12. WHO. Definition and diagnosis of diabetes mellitus and intermediate hyperglycemia: report of a WHO/IDF consultation. Geneva: World Health Organization 2006: 1–50. -
13. Viera AJ, Garrett JM. Understanding interobserver agreement: the kappa statistic. *Fam Med* 2005;37(5):360–3.
14. Turner L, Boutron I, Hróbjartsson A, et al. The evolution of assessing bias in Cochrane systematic reviews of interventions: celebrating methodological contributions of the Cochrane Collaboration. *Syst Rev* 2013;2:79.
15. Miller JJ. The Inverse of the Freeman – Tukey Double Arcsine Transformation. *Am Stat* 1978;32(4):138–138.

16. Huedo-Medina TB, Sánchez-Meca J, Marín-Martínez F, et al. Assessing heterogeneity in meta-analysis: Q statistic or I2 index? *Psychol Methods* 2006;11(2):193–206.
17. Stroup DF, Berlin JA, Morton SC, et al. Meta-analysis of observational studies in epidemiology: A proposal for reporting. *JAMA* 2000;283(15):2008–12.

For peer review only

**Table 1: Search strategy for PubMed**

| Search | Search terms                                                                                                                                             |
|--------|----------------------------------------------------------------------------------------------------------------------------------------------------------|
| 1      | “Tuberculosis” OR “TB” OR “Mycobacterium” OR “Pleuresy”                                                                                                  |
| 2      | “Diabetes” OR “diabetes mellitus” OR “hyperglycemia” OR “diabetic patients” OR “diabetic” OR dysglycemia OR glucose abnormalities OR glucose intolerance |
| 3      | # 1 AND # 2                                                                                                                                              |
| 4      | Studies published in English/French                                                                                                                      |

**PRISMA-P (Preferred Reporting Items for Systematic review and Meta-Analysis Protocols) with pages containing all items of review protocol**

| Section and topic                 | Page N° of items | Checklist item                                                                                                                                                                                                                |
|-----------------------------------|------------------|-------------------------------------------------------------------------------------------------------------------------------------------------------------------------------------------------------------------------------|
| <b>ADMINISTRATIVE INFORMATION</b> |                  |                                                                                                                                                                                                                               |
| Title:                            |                  |                                                                                                                                                                                                                               |
| Identification                    | 1                | Identify the report as a protocol of a systematic review                                                                                                                                                                      |
| Registration                      | 9                | If registered, provide the name of the registry (such as PROSPERO) and registration number                                                                                                                                    |
| Authors:                          |                  |                                                                                                                                                                                                                               |
| Contact                           | 1                | Provide name, institutional affiliation, e-mail address of all protocol authors; provide physical mailing address of corresponding author                                                                                     |
| Contributions                     | 10               | Describe contributions of protocol authors and identify the guarantor of the review                                                                                                                                           |
| Support:                          |                  |                                                                                                                                                                                                                               |
| Sources                           | 10               | Indicate sources of financial or other support for the review                                                                                                                                                                 |
| Sponsor                           |                  | Provide name for the review funder and/or sponsor                                                                                                                                                                             |
| <b>INTRODUCTION</b>               |                  |                                                                                                                                                                                                                               |
| Rationale                         | 4                | Describe the rationale for the review in the context of what is already known                                                                                                                                                 |
| Objectives                        | 5                | Provide an explicit statement of the question(s) the review will address with reference to participants, interventions, comparators, and outcomes (PICO)                                                                      |
| <b>METHODS</b>                    |                  |                                                                                                                                                                                                                               |
| Eligibility criteria              | 5&6              | Specify the study characteristics (such as PICO, study design, setting, time frame) and report characteristics (such as years considered, language, publication status) to be used as criteria for eligibility for the review |
| Information sources               | 12               | Describe all intended information sources (such as electronic databases, contact with study authors, trial registers or other grey literature sources) with planned dates of coverage                                         |
| Search strategy                   | 10               | Present draft of search strategy to be used for at least one electronic database, including planned limits, such that it could be repeated                                                                                    |
| Study records:                    |                  |                                                                                                                                                                                                                               |
| Data management                   | 6                | Describe the mechanism(s) that will be used to manage records and data throughout the review                                                                                                                                  |
| Selection process                 | 7                | State the process that will be used for selecting studies (such as two independent reviewers) through each phase of the review (that is, screening, eligibility and inclusion in meta-analysis)                               |

|                                    |     |                                                                                                                                                                                                                                                  |
|------------------------------------|-----|--------------------------------------------------------------------------------------------------------------------------------------------------------------------------------------------------------------------------------------------------|
| Data collection process            | 7   | Describe planned method of extracting data from reports (such as piloting forms, done independently, in duplicate), any processes for obtaining and confirming data from investigators                                                           |
| Data items                         | 8   | List and define all variables for which data will be sought (such as PICO items, funding sources), any pre-planned data assumptions and simplifications                                                                                          |
| Outcomes and prioritization        | 8   | List and define all outcomes for which data will be sought, including prioritization of main and additional outcomes, with rationale                                                                                                             |
| Risk of bias in individual studies | 7   | Describe anticipated methods for assessing risk of bias of individual studies, including whether this will be done at the outcome or study level, or both; state how this information will be used in data synthesis                             |
| Data synthesis                     | 8&9 | Describe criteria under which study data will be quantitatively synthesised                                                                                                                                                                      |
|                                    | 8   | If data are appropriate for quantitative synthesis, describe planned summary measures, methods of handling data and methods of combining data from studies, including any planned exploration of consistency (such as $I^2$ , Kendall's $\tau$ ) |
|                                    | 8   | Describe any proposed additional analyses (such as sensitivity or subgroup analyses, meta-regression)                                                                                                                                            |
|                                    | 8   | If quantitative synthesis is not appropriate, describe the type of summary planned                                                                                                                                                               |
| Meta-bias(es)                      | 8   | Specify any planned assessment of meta-bias(es) (such as publication bias across studies, selective reporting within studies)                                                                                                                    |
| Confidence in cumulative evidence  | 8   | Describe how the strength of the body of evidence will be assessed (such as GRADE)                                                                                                                                                               |

# BMJ Open

## Global prevalence of diabetes mellitus in patients with tuberculosis: a systematic review and meta-analysis protocol

|                                 |                                                                                                                                                                                                                                                                                                                                                                                                                                                                                                                                                                                                                                                                                                                                                                                                         |
|---------------------------------|---------------------------------------------------------------------------------------------------------------------------------------------------------------------------------------------------------------------------------------------------------------------------------------------------------------------------------------------------------------------------------------------------------------------------------------------------------------------------------------------------------------------------------------------------------------------------------------------------------------------------------------------------------------------------------------------------------------------------------------------------------------------------------------------------------|
| Journal:                        | <i>BMJ Open</i>                                                                                                                                                                                                                                                                                                                                                                                                                                                                                                                                                                                                                                                                                                                                                                                         |
| Manuscript ID                   | bmjopen-2016-015170.R2                                                                                                                                                                                                                                                                                                                                                                                                                                                                                                                                                                                                                                                                                                                                                                                  |
| Article Type:                   | Protocol                                                                                                                                                                                                                                                                                                                                                                                                                                                                                                                                                                                                                                                                                                                                                                                                |
| Date Submitted by the Author:   | 24-Feb-2017                                                                                                                                                                                                                                                                                                                                                                                                                                                                                                                                                                                                                                                                                                                                                                                             |
| Complete List of Authors:       | Tankeu, Aurel; Faculty of Medecine and Biomedical Sciences, Internal medicine and specialities<br>Bigna, Jean Joel; Centre Pasteur of Cameroon, Epidemiology and Public Health; Faculty of Medicine, University of Paris Sud XI, Le Kremlin Bicêtre<br>Nansseu, Jobert Richie; Mother and Child Centre, Chantal Biya Foundation, Sickle cell unit<br>Endomba, Francky Teddy ; Faculty of Medicine and Biomedical Sciences, University of Yaounde 1, Department of Internal Medicine and specialties<br>Wafeu, Guy; Faculty of Medicine and Biomedical Sciences, University of Yaoundé 1, Internal Medicine and specialities<br>Kaze, Arnaud; Brigham and Women's Hospital, Harvard Medical School<br>Noubiap, Jean Jacques; Groote Schuur Hospital and University of Cape Town, Department of Medicine, |
| <b>Primary Subject Heading</b>: | Diabetes and endocrinology                                                                                                                                                                                                                                                                                                                                                                                                                                                                                                                                                                                                                                                                                                                                                                              |
| Secondary Subject Heading:      | Infectious diseases, Public health, Diabetes and endocrinology                                                                                                                                                                                                                                                                                                                                                                                                                                                                                                                                                                                                                                                                                                                                          |
| Keywords:                       | General diabetes < DIABETES & ENDOCRINOLOGY, Tuberculosis < INFECTIOUS DISEASES, Public health < INFECTIOUS DISEASES                                                                                                                                                                                                                                                                                                                                                                                                                                                                                                                                                                                                                                                                                    |
|                                 |                                                                                                                                                                                                                                                                                                                                                                                                                                                                                                                                                                                                                                                                                                                                                                                                         |

SCHOLARONE™  
Manuscripts



1  
2  
3 **Global prevalence of diabetes mellitus in patients with tuberculosis: a systematic review**  
4  
5 **and meta-analysis protocol**  
6  
7  
8

9  
10 Aurel T. Tankeu<sup>1</sup>, Jean Joël R. Bigna<sup>2,3</sup>, Jobert Richie N. Nansseu<sup>4,5</sup>, Francky Teddy A.  
11 Endomba<sup>1</sup>, Guy Sadeu Wafeu<sup>1</sup>, Arnaud D. Kaze<sup>6</sup>, Jean Jacques N. Noubiap<sup>7\*</sup>  
12  
13

- 14 1. Department of Internal Medicine and Specialties, Faculty of Medicine and Biomedical  
15 Sciences, Yaoundé, Cameroon
- 16 2. Department of Epidemiology and Public Health, Centre Pasteur of Cameroon,  
17 Yaoundé, Cameroon
- 18 3. Faculty of Medicine, University of Paris Sud XI, Le Kremlin Bicêtre, France
- 19 4. Department of Public Health, Faculty of Medicine and Biomedical Sciences,  
20 University of Yaoundé 1, Yaoundé, Cameroon
- 21 5. Sickle Cell Disease Unit, Mother and Child Centre of the Chantal Biya Foundation,  
22 Yaoundé, Cameroon
- 23 6. Brigham and Women's Hospital, Harvard Medical School, Boston, MA, USA
- 24 7. Department of Medicine, Groote Schuur Hospital and University of Cape Town, Cape  
25 Town, South Africa

26  
27 E-mail addresses: ATT: aurelnet2014@yahoo.com; JJRB: bignarimjj@yahoo.fr; JRNN:  
28 jobertrichie\_nansseu@yahoo.fr; ADK: kazearnaud@yahoo.fr; FTAE: tedissimo@yahoo.com;  
29 GSW: wafeuguy@yahoo.fr; JJNN: noubiapjj@yahoo.fr  
30  
31  
32  
33  
34

35  
36  
37  
38  
39  
40  
41  
42 \*Corresponding author: Dr Jean Jacques N. Noubiap. Department of Medicine, Groote Schuur  
43 Hospital and University of Cape Town, 7295, Cape Town, South Africa. noubiapjj@yahoo.fr.  
44  
45  
46  
47  
48  
49  
50  
51  
52  
53  
54  
55  
56  
57  
58  
59  
60

## Abstract

**Introduction:** Diabetes mellitus is an important risk factor for active tuberculosis (TB), which also adversely affect TB treatment outcomes. The escalating global DM epidemic is fueling the burden of TB and should therefore be a major target in the strategy for ending TB. This review aims to estimate the global prevalence of diabetes mellitus in patients with tuberculosis

**Methods and analysis:** This systematic review will include cross-sectional, case-control or cohort studies of populations including patients diagnosed with tuberculosis that have reported the prevalence of diabetes mellitus using one of the fourth standard recommendations for screening and diagnosis. This protocol is written in accordance with recommendations from the Preferred Reporting Items for Systematic Review and Meta-Analysis Protocols (PRISMA-P) 2015 statement. Relevant abstracts published in English/French from inception to December 31, 2016 will be searched in PubMed, Excerpta Medica Database, and online journals. Two investigators will independently screen, select studies, extract data and assess the risk of bias in each study. The study-specific estimates will be pooled through a random-effects meta-analysis model to obtain an overall summary estimate of the prevalence of diabetes across the studies. Heterogeneity will be assessed, and we will pool studies judged to be clinically homogenous. On the other hand, statistical heterogeneity will be evaluated by the  $\chi^2$  test on Cochrane's Q statistic. Funnel-plots analysis and Egger's test will be used to investigate publication bias. Results will be presented by continent or geographic regions.

### **Ethics and dissemination**

This study is based on published data, and therefore ethical approval is not a requirement. This systematic review and meta-analysis is expected to inform health care providers as well as general population on the co-occurrence of these threatening conditions. The final report of this study in the form of a scientific paper will be published in a peer-reviewed journal. Its findings will also be presented at conferences and submitted to relevant health authorities. We also plan to update the review in the future to monitor changes and guide health service and policy solutions.

### **Protocol and registration**

The protocol for this review has been published in the PROSPERO International Prospective Register of systematic reviews, <http://www.crd.york.ac.uk/PROSPERO> registration number: CRD42016049901

### **Strengths and limitations of this study**

- This will be the first systematic review and meta-analysis aiming to estimate the global prevalence of diabetes mellitus in patients suffering from tuberculosis.
- Methodological and statistical procedures that will be used to derive accurate estimates are powerful and reliable.
- This review would be limited by difficulties related to the accurate diagnosis of tuberculosis infection in some regions.
- Some studies could also be missed due to language restriction
- Another possible limitation could be the heterogeneity

## Introduction

### Rationale

Despite the laudable progress registered in the control of tuberculosis, it remains a huge global health threat [1]. In 2014, an estimated 9.6 million people developed new active TB and 1.5 million people died from the disease [2]. Although HIV is still the greatest risk factor for TB, there are several other important determinants of the TB epidemic, among which diabetes mellitus (DM) is of growing interest [3]. Indeed, there is overwhelming evidence that DM represents a major impediment in bending the TB epidemic. DM and poor glycaemic control triple the risk of TB and adversely affect TB treatment outcomes such as prolongation of culture conversion, treatment failure, relapse and death. Much more, the world is currently facing a surge in DM prevalence with 1 adult on 11 who has DM and this will increase to 1/10 adults by 2040. The DM epidemic is therefore fueling the TB epidemic [4–6]. The vital need to address the escalating global DM epidemic as part of the strategy for ending TB has led to the creation of Collaborative Framework for Care and Control of Tuberculosis and Diabetes which provides guidance on bidirectional screening and treatment of the two diseases [7–9]. The framework recommends as one major key points the screening and management of DM in patients with TB [3,10]. Systematic screening has shown prevalence rates of DM in TB patients up to 15%, especially in countries with high prevalence of DM at the population level [7–11]. However we are not aware of any previous effort to evaluate the burden of DM in TB patients at the global level. We present here a protocol for a systematic review and meta-analysis to summarize the existing data on the prevalence of DM in patients with TB, with the aim of providing accurate data for monitoring of future trends.

## Objectives

This systematic review aims to determine the global prevalence of DM among patients with TB.

## Review question

This review of studies published in the past 30 years, from 1 January 1986 to 31 August 2016, should answer the following question:

What is the global prevalence of DM among patients with TB?

## Criteria for considering studies for the review

### Inclusion criteria

We will include cross-sectional, case-control or cohort studies conducted in patients suffering from pulmonary drug-sensitive or resistant TB and reporting on the prevalence of DM or providing enough data to compute this estimate. We will consider extra-pulmonary tuberculosis diagnosed by culture of *Mycobacterium tuberculosis* and also those which will have been treated as such despite the absence of culture of *Mycobacterium Tuberculosis*. However, this second group will not be considered for the meta-analysis but will be used for the narrative part review. The diagnosis of diabetes will have to have been made by a physician or defined based on measured fasting plasma glucose (FPG), oral glucose tolerance test (OGTT), or self-report, according to WHO criteria [12]. Tuberculosis cases must have been diagnosed based on WHO criteria [13].

### Exclusion criteria

1  
2  
3 We will exclude:  
4  
5

- 6 1- Commentaries, editorials and cases series with less than 50 patients..  
7  
8  
9 2. Duplicates: for studies published in more than one paper, the most comprehensive one  
10 reporting the largest sample size will be considered.  
11  
12  
13  
14 3. Studies whose key data will not be accessible even after request from the authors.  
15  
16  
17  
18  
19

## 20 **Search strategy for identifying relevant studies**

21  
22

23 The search strategy will be implemented in two stages:  
24  
25

### 26 **Bibliographic database searches**

27  
28

29  
30 A. Relevant abstracts on the prevalence of DM among TB patients will be identified via  
31 searching PubMed, Excerpta Medica Database (Embase), Index Medicus and African online  
32 journals. The search will be limited to studies published from inception to December 31, 2016  
33  
34 Key search terms will include: “tuberculosis”, “TB”, “mycobacterium”, “diabetes”, “diabetic  
35 patients” and “hyperglycemia”. The PubMed search strategy is shown in Table 1, and will be  
36 adapted for other databases.  
37  
38  
39  
40  
41  
42

43  
44 B. Abstracts of all eligible papers will be reviewed and their full articles in the second time.  
45  
46 Additionally, references of all relevant articles will be scrutinized for other potential data  
47 sources, and their full texts will be accessed in a similar way. Authors whose full text papers  
48 will not be accessible by the numerous internet-based sources will be directly contacted to  
49 provide them. In case of no feedback from these authors, the corresponding studies will be  
50 excluded.  
51  
52  
53  
54  
55  
56  
57  
58  
59  
60

### **Selection of studies deemed relevant for inclusion in the review**

Assessment of eligible papers will be independently run by two authors using an assessment guide to ensure that the selection criteria are reliably applied by them all (ATT and JJB). They will screen titles and abstracts obtained from the searches and retrieve all full texts of potentially eligible papers. Thereafter, they will independently review the full text of each potentially eligible study, compare their results and resolve any discrepancy by discussion and consensus. If a decision is not reached, a third review author will be consulted for arbitration (JJB). Level of agreement between review authors will be measured using the Cohen's Kappa statistic [14].

### **Assessment of methodological quality and reporting of data**

The Newcastle-Ottawa Scale (NOS) for assessing the quality of non-randomized studies in meta-analyses will be used to assess the methodological quality and risk of bias for each study [15]. Risk of bias and quality scores will be presented in a table.

### **Data extraction and management**

A data extraction sheet will be used to collect information relating to the country, the region, year of publication, type of study, period of the study, study design, study setting, number of participants, mean/median age or age range of the population, diagnostic criteria for each condition, the presence of another important comorbidity like HIV and the prevalence of DM. Where prevalence rates or information for calculating them (eg, sample size, number of outcomes) are lacking, we will directly contact the corresponding author to request the information. We will conduct a subgroup analysis using comorbidities, different diagnosis criteria and period of the study. The results will be separate to show the population

1  
2  
3 characteristics and prevalence within individual countries. Where it will not be possible to  
4  
5 disaggregate the data by country, the study will be presented as one and the countries in which  
6  
7 the study was done will be shown.  
8  
9

### 10 **Statistical analysis**

11  
12  
13 Data will be analyzed using Stata software (Stata Corp V.14, Texas, USA). A meta-analysis  
14  
15 will be conducted for data obtained from studies in which DM will have been diagnosed using  
16  
17 the same diagnosis criteria. Standard errors (SEs) for the study-specific estimates will first be  
18  
19 determined from the point estimate and the appropriate denominators, assuming a binominal  
20  
21 distribution. Then, the study-specific estimates will be pooled through a random-effects meta-  
22  
23 analysis model to obtain an overall summary estimate of the prevalence across studies, after  
24  
25 stabilizing the variance of individual studies using the Freeman-Tukey double arc-sine  
26  
27 transformation [16]. Heterogeneity will be evaluated by the  $\chi^2$  test on Cochrane's Q statistic  
28  
29 which is quantified by  $I^2$  values, assuming that  $I^2$  values of 25%, 50% and 75% represent low,  
30  
31 medium and high heterogeneity respectively [17]. Where substantial heterogeneity will be  
32  
33 detected, a subgroup analysis will be performed to detect its possible sources using the  
34  
35 following grouping variables: age group, the period of diagnosis (beginning or ending of  
36  
37 treatment), positivity of sputum culture at microscopy, relapse or recurrence, association to  
38  
39 others comorbid conditions such as HIV, continent or geographical area and study quality.  
40  
41 Funnel plots analysis and Egger's test will be performed to detect publication bias. Results  
42  
43 will be presented by continent or geographical regions.  
44  
45  
46  
47  
48

### 49 **Results reporting and presentation**

50  
51  
52 The study selection process will be summarised using a flow diagram. Reasons for studies'  
53  
54 exclusion will be described. This will follow the MOOSE Guidelines for Meta-Analyses and  
55  
56 Systematic Reviews of Observational Studies [18]. Tables and forest plots will serve to  
57  
58  
59  
60



1  
2  
3 summarize quantitative data where appropriate. We will examine prevalence by continent,  
4  
5 time period of diagnosis, presence of others comorbid conditions, and classification of TB  
6  
7 infection depending on available data. We plan to report on quality scores and risk of bias for  
8  
9 each eligible study. This may be tabulated and accompanied by narrative summaries.  
10

### 11 12 13 **Ethics and dissemination**

14  
15 This study is based on published data, and therefore ethical approval is not a requirement.  
16  
17 This systematic review and meta-analysis is expected to inform health care providers as well  
18  
19 as general population on the co-occurrence of these threatening conditions. The final report of  
20  
21 this study in the form of a scientific paper will be published in a peer-reviewed journal. Its  
22  
23 findings will also be presented at conferences and submitted to relevant health authorities. We  
24  
25 also plan to update the review in the future to monitor changes and guide health service and  
26  
27 policy solutions.  
28  
29  
30  
31  
32  
33  
34

### 35 **Conclusion**

36  
37  
38 TB remains a major global health problem. The prevalence of DM which is known as an  
39  
40 important risk factor for TB patients is escalating worldwide and is thought to contribute  
41  
42 significantly in the burden of TB. According to the rising figures of DM worldwide, we  
43  
44 hypothesized that the global prevalence of DM among TB patients is elevated and we are  
45  
46 conducting this review to estimate its magnitude. We expect to provide accurate data for  
47  
48 effective policies making and for monitoring of future trends. Much more, this review may  
49  
50 identify the research gaps and remaining challenges that may form the basis of future studies  
51  
52 to improve our understanding of the prevalence and impact of DM in TB patients  
53  
54  
55  
56  
57  
58  
59  
60

1  
2  
3 The major limitation of this study could be the heterogeneity generated by the variability in  
4 DM diagnostic criteria for, especially as the definition of DM has changed over time. Despite  
5 these potential limitations, this review will be, to the best of our knowledge, the first study  
6 aiming to estimate the global prevalence of DM among TB patients. In addition, since we will  
7 only include studies that full-text or abstracts are published in French/English, we could  
8 missed some studies published in another language. However, most of paper now are  
9 published in English even from researchers in countries where English is not the official  
10 language, so, most of the studies on the topic are expected to be in English.  
11  
12  
13  
14  
15  
16  
17  
18  
19  
20  
21  
22  
23  
24  
25  
26  
27

### 28 **Authors' Contributions**

29 JJNN, ATT, FTAE and GW conceived and designed the protocol. ATT drafted the  
30 manuscript. ATT, JJRB, JRNN, FTAE, GSW, ADK and JJNN critically revised the  
31 manuscript for methodological and intellectual content. JJNN is the guarantor of the review.  
32 All authors approved the final version of this manuscript.  
33  
34  
35  
36  
37  
38  
39

### 40 **Funding**

41 This research received no specific grant from any funding agency in the public, commercial or  
42 not-for-profit sectors.  
43  
44  
45  
46

### 47 **Competing interests**

48 None  
49  
50  
51  
52  
53  
54

### 55 **References**

56  
57  
58  
59  
60

1. GBD 2015 SDG Collaborators. Measuring the health-related Sustainable Development Goals in 188 countries: a baseline analysis from the Global Burden of Disease Study 2015. *Lancet Lond Engl*. 2016 Sep 19;
2. Zumla A, George A, Sharma V, Herbert RHN, Baroness Masham of Ilton, Oxley A, et al. The WHO 2014 global tuberculosis report--further to go. *Lancet Glob Health*. 2015 Jan;3(1):e10–2.
3. Harries AD, Kumar AMV, Satyanarayana S, Lin Y, Zachariah R, Lönnroth K, et al. Addressing diabetes mellitus as part of the strategy for ending TB. *Trans R Soc Trop Med Hyg*. 2016 Mar;110(3):173–9.
4. Lönnroth K, Roglic G, Harries AD. Improving tuberculosis prevention and care through addressing the global diabetes epidemic: from evidence to policy and practice. *Lancet Diabetes Endocrinol*. 2014 Sep;2(9):730–9.
5. Baker MA, Harries AD, Jeon CY, Hart JE, Kapur A, Lönnroth K, et al. The impact of diabetes on tuberculosis treatment outcomes: a systematic review. *BMC Med*. 2011;9:81.
6. Salindri AD, Kipiani M, Kempker RR, Gandhi NR, Darchia L, Tukvadze N, et al. Diabetes Reduces the Rate of Sputum Culture Conversion in Patients With Newly Diagnosed Multidrug-Resistant Tuberculosis. *Open Forum Infect Dis*. 2016 Sep;3(3):ofw126.
7. Castellanos-Joya M, Delgado-Sánchez G, Ferreyra-Reyes L, Cruz-Hervert P, Ferreira-Guerrero E, Ortiz-Solis G, et al. Results of the Implementation of a Pilot Model for the Bidirectional Screening and Joint Management of Patients with Pulmonary Tuberculosis and Diabetes Mellitus in Mexico. *PLoS ONE* [Internet]. 2014 Sep 17 [cited 2016 Oct 8];9(9). Available from: <http://www.ncbi.nlm.nih.gov/pmc/articles/PMC4167852/>
8. Harries AD, Satyanarayana S, Kumar AMV, Nagaraja SB, Isaakidis P, Malhotra S, et al. Epidemiology and interaction of diabetes mellitus and tuberculosis and challenges for care: a review. *Public Health Action*. 2013 Nov 4;3(Suppl 1):S3–9.
9. Kumar S, Kumar N, Vivekadhish S. Millennium Development Goals (MDGs) to Sustainable Development Goals (SDGs): Addressing Unfinished Agenda and Strengthening Sustainable Development and Partnership. *Indian J Community Med Off Publ Indian Assoc Prev Soc Med*. 2016;41(1):1–4.
10. Kapur A, Harries AD. The double burden of diabetes and tuberculosis - public health implications. *Diabetes Res Clin Pract*. 2013 Jul;101(1):10–9.
11. Siddiqui AN, Khayyam KU, Sharma M. Effect of Diabetes Mellitus on Tuberculosis Treatment Outcome and Adverse Reactions in Patients Receiving Directly Observed Treatment Strategy in India: A Prospective Study. *BioMed Res Int*. 2016;2016:7273935.
12. WHO. Definition and diagnosis of diabetes mellitus and intermediate hyperglycemia: report of a WHO/IDF consultation. Geneva: World Health Organization, 2006: 1–50. - Recherche Google [Internet]. [cited 2016 Oct 19]. 13. Global Tuberculosis Report 2016 [Internet]. ReliefWeb. 2016 [cited 2017 Feb 23]. Available from: <http://reliefweb.int/report/world/global-tuberculosis-report-2016>

14. Viera AJ, Garrett JM. Understanding interobserver agreement: the kappa statistic. *Fam Med*. 2005 May;37(5):360–3.
15. Turner L, Boutron I, Hróbjartsson A, Altman DG, Moher D. The evolution of assessing bias in Cochrane systematic reviews of interventions: celebrating methodological contributions of the Cochrane Collaboration. *Syst Rev*. 2013 Sep 23;2:79.
16. Miller JJ. The Inverse of the Freeman – Tukey Double Arcsine Transformation. *Am Stat*. 1978 Nov;32(4):138–138.
17. Huedo-Medina TB, Sánchez-Meca J, Marín-Martínez F, Botella J. Assessing heterogeneity in meta-analysis: Q statistic or I2 index? *Psychol Methods*. 2006 Jun;11(2):193–206.
18. Stroup DF, Berlin JA, Morton SC, et al. Meta-analysis of observational studies in epidemiology: A proposal for reporting. *JAMA*. 2000 avril;283(15):2008–12.

peer review only

**Table 1: Search strategy for PubMed**

| Search | Search terms                                                                                                                                             |
|--------|----------------------------------------------------------------------------------------------------------------------------------------------------------|
| 1      | "Tuberculosis" OR "TB" OR "Mycobacterium" OR "Pleuresy"                                                                                                  |
| 2      | "Diabetes" OR "diabetes mellitus" OR "hyperglycemia" OR "diabetic patients" OR "diabetic" OR dysglycemia OR glucose abnormalities OR glucose intolerance |
| 3      | # 1 AND # 2                                                                                                                                              |
| 4      | Studies published in English/French                                                                                                                      |

**PRISMA-P (Preferred Reporting Items for Systematic review and Meta-Analysis Protocols) 2015 checklist: recommended items to address in a systematic review protocol\***

| Section and topic                 | Item No | Checklist item                                                                                                                                                                                  | Page |
|-----------------------------------|---------|-------------------------------------------------------------------------------------------------------------------------------------------------------------------------------------------------|------|
| <b>ADMINISTRATIVE INFORMATION</b> |         |                                                                                                                                                                                                 |      |
| Title:                            |         |                                                                                                                                                                                                 |      |
| Identification                    | 1a      | Identify the report as a protocol of a systematic review                                                                                                                                        | 1    |
| Update                            | 1b      | If the protocol is for an update of a previous systematic review, identify as such                                                                                                              |      |
| Registration                      | 2       | If registered, provide the name of the registry (such as PROSPERO) and registration number                                                                                                      | 3    |
| Contact                           | 3a      | Provide name, institutional affiliation, e-mail address of all protocol authors; provide physical mailing address of corresponding author                                                       | 1    |
| Contributions                     | 3b      | Describe contributions of protocol authors and identify the guarantor of the review                                                                                                             | 10   |
| Amendments                        | 4       | If the protocol represents an amendment of a previously completed or published protocol, identify as such and list changes; otherwise, state plan for documenting important protocol amendments | /    |
| Support:                          |         |                                                                                                                                                                                                 |      |
| Sources                           | 5a      | Indicate sources of financial or other support for the review                                                                                                                                   | 10   |
| Sponsor                           | 5b      | Provide name for the review funder and/or sponsor                                                                                                                                               | 10   |
| Role of sponsor or funder         | 5c      | Describe roles of funder(s), sponsor(s), and/or institution(s), if any, in developing the protocol                                                                                              | 10   |
| <b>INTRODUCTION</b>               |         |                                                                                                                                                                                                 |      |
| Rationale                         | 6       | Describe the rationale for the review in the context of what is already known                                                                                                                   | 4    |
| Objectives                        | 7       | Provide an explicit statement of the question(s) the review will address with reference to participants, interventions, comparators, and outcomes (PICO)                                        | 5    |
| <b>METHODS</b>                    |         |                                                                                                                                                                                                 |      |
| Eligibility criteria              | 8       | Specify the study characteristics (such as PICO, study design, setting,                                                                                                                         | 5+6  |

|                                    |     |                                                                                                                                                                                                                                                  |     |
|------------------------------------|-----|--------------------------------------------------------------------------------------------------------------------------------------------------------------------------------------------------------------------------------------------------|-----|
|                                    |     | time frame) and report characteristics (such as years considered, language, publication status) to be used as criteria for eligibility for the review                                                                                            |     |
| Information sources                | 9   | Describe all intended information sources (such as electronic databases, contact with study authors, trial registers or other grey literature sources) with planned dates of coverage                                                            | 6   |
| Search strategy                    | 10  | Present draft of search strategy to be used for at least one electronic database, including planned limits, such that it could be repeated                                                                                                       | 13  |
| Study records:                     |     |                                                                                                                                                                                                                                                  |     |
| Data management                    | 11a | Describe the mechanism(s) that will be used to manage records and data throughout the review                                                                                                                                                     | 7+8 |
| Selection process                  | 11b | State the process that will be used for selecting studies (such as two independent reviewers) through each phase of the review (that is, screening, eligibility and inclusion in meta-analysis)                                                  | 7   |
| Data collection process            | 11c | Describe planned method of extracting data from reports (such as piloting forms, done independently, in duplicate), any processes for obtaining and confirming data from investigators                                                           | 7   |
| Data items                         | 12  | List and define all variables for which data will be sought (such as PICO items, funding sources), any pre-planned data assumptions and simplifications                                                                                          | /   |
| Outcomes and prioritization        | 13  | List and define all outcomes for which data will be sought, including prioritization of main and additional outcomes, with rationale                                                                                                             | /   |
| Risk of bias in individual studies | 14  | Describe anticipated methods for assessing risk of bias of individual studies, including whether this will be done at the outcome or study level, or both; state how this information will be used in data synthesis                             | 7   |
| Data synthesis                     | 15a | Describe criteria under which study data will be quantitatively synthesised                                                                                                                                                                      | 7+8 |
|                                    | 15b | If data are appropriate for quantitative synthesis, describe planned summary measures, methods of handling data and methods of combining data from studies, including any planned exploration of consistency (such as $I^2$ , Kendall's $\tau$ ) | 8   |
|                                    | 15c | Describe any proposed additional analyses (such as sensitivity or subgroup analyses, meta-regression)                                                                                                                                            | 8   |
|                                    | 15d | If quantitative synthesis is not appropriate, describe the type of summary planned                                                                                                                                                               | 8   |
| Meta-bias(es)                      | 16  | Specify any planned assessment of meta-bias(es) (such as publication                                                                                                                                                                             | /   |

|                                   |    |                                                                                    |   |
|-----------------------------------|----|------------------------------------------------------------------------------------|---|
|                                   |    | bias across studies, selective reporting within studies)                           |   |
| Confidence in cumulative evidence | 17 | Describe how the strength of the body of evidence will be assessed (such as GRADE) | / |

**\* It is strongly recommended that this checklist be read in conjunction with the PRISMA-P Explanation and Elaboration (cite when available) for important clarification on the items. Amendments to a review protocol should be tracked and dated. The copyright for PRISMA-P (including checklist) is held by the PRISMA-P Group and is distributed under a Creative Commons Attribution Licence 4.0.**

*From: Shamseer L, Moher D, Clarke M, Ghersi D, Liberati A, Petticrew M, Shekelle P, Stewart L, PRISMA-P Group. Preferred reporting items for systematic review and meta-analysis protocols (PRISMA-P) 2015: elaboration and explanation. BMJ. 2015 Jan 2;349(jan02 1):g7647.*
